# Supplementary material for: The Eyewitness Community Survey: An Engaging Citizen Science Tool to Capture Reliable Data while Improving Community Participants’ Environmental Health Knowledge and Attitudes
Source: MDPI journal article supplement (doi:10.3390/ijerph20146374), 2023-07-16
Supplement: s1 [file s1]

**Table S1:** Phase I intra-observer agreement measured by Kappa coefficient by category

| Rater    | Kappa (95%CI)     |                  |                   |                  |                   |                  |
|----------|-------------------|------------------|-------------------|------------------|-------------------|------------------|
|          | Buildings         | Infrastructure   | Resources         | Garbage          | People            | Overall          |
| Adults   |                   |                  |                   |                  |                   |                  |
| 1        | 0.70 (0.51-0.88)  | 0.94 (0.87-1.02) | 0.36 (-0.21-0.93) | 0.85 (0.64-1.05) | 0.78 (0.49-1.07)  | 0.86 (0.80-0.92) |
| 2        | 0.31 (-0.07-0.69) | 0.92 (0.78-1.07) | *                 | 0.67 (0.27-1.06) | 0.35 (-0.17-0.87) | 0.72 (0.58-0.86) |
| 3        | 1.0               | 1.0              | *                 | 1.0              | 1.0               | 0.98 (0.93-1.03) |
| 4        | 1.0               | 0.85 (0.65-1.04) | *                 | 0.64 (0.21-1.06) | 1.0               | 0.90 (0.81-0.99) |
| 5        | 0.43 (0.21-0.66)  | 0.90 (0.81-0.99) | 0.22 (-0.06-0.51) | 0.75 (0.49-1)    | 0.55 (0.26-0.84)  | 0.69 (0.61-0.77) |
| Children |                   |                  |                   |                  |                   |                  |
| 6        | 0.59 (0.29-0.89)  | 0.73 (0.49-0.97) | *                 | 0.48 (0.06-0.90) | 0.57 (0.29-0.85)  | 0.68 (0.56-0.81) |

Note: No statistics are computed for pollution because raters' observations are constants.

**Table S2:** Phase II intra-observer agreement measured by Kappa coefficient by category

| Rater    | Kappa (95%CI)      |                    |                      |                    |                  |                   |
|----------|--------------------|--------------------|----------------------|--------------------|------------------|-------------------|
|          | Garbage            | Pollution          | Resources            | Infrastructure     | Buildings        | Overall           |
| Adults   |                    |                    |                      |                    |                  |                   |
| 1        | 0.69 (0.38 - 1.00) | 0.50 (0.14 - 0.86) | 0.10 (- 0.28 - 0.49) | 0.57 (0.41 - 0.74) | 0.74 (0.56-0.92) | 0.61 (0.50-0.72)  |
| 2        | 0.80 (0.55-1.06)   | 0.86 (0.59-1.13)   | 0.47 (-0.13 - 1.07)  | 0.68 (0.50 - 0.85) | 0.76 (0.58-0.94) | 0.73 (0.63-0.83)  |
| 3        | 0.53 (0.18-0.88)   | 0.21 (-0.26-0.69)  | 0.71 (0.40-1.02)     | 0.66 (0.50-0.81)   | 0.61 (0.43-0.80) | 0.61 (0.51-0.71)  |
| 4        | 0.65 (0.34-0.96)   | 0.63 (0.30-0.97)   | 0.73 (0.45-1.02)     | 0.60 (0.46-0.74)   | 0.93 (0.85-1.01) | 0.73 (0.65-0.81)  |
| 5        | 0.64 (0.32-0.95)   | 0.57 (0.14-1)      | 0.51 (0.19-0.82)     | 0.86 (0.76-0.96)   | 0.67 (0.49-0.85) | 0.74 (0.65-0.83)  |
| 6        | 0.91 (0.72-1.09)   | 0.86 (0.59-1.13)   | 0.51 (0.20-0.82)     | 0.81 (0.70-0.92)   | 0.80 (0.67-0.94) | 0.79 (0.71-0.87)  |
| 7        | 0.65 (0.01-1.28)   | 0.86 (0.59-1.13)   | 0.87 (0.62-1.12)     | 0.69 (0.55-0.83)   | 0.82 (0.67-0.97) | 0.77 (0.68-0.86)  |
| 8        | 0.75 (0.42-1.08)   | 1.0                | 0.62 (0.23-1.00)     | 0.78 (0.66-0.90)   | 0.74 (0.57-0.91) | 0.78 (0.69-0.86)  |
| 9        | 0.87 (0.61-1.12)   | 0.87 (0.61-1.12)   | 0.33 (0.02-0.65)     | 0.84 (0.74-0.95)   | 0.84 (0.70-0.98) | 0.80 (0.72-0.88)  |
| 10       | 0.91 (0.73-1.08)   | 0.39 (0.05-0.73)   | 0.59 (0.31-0.88)     | 0.43 (0.27-0.59)   | 0.43 (0.24-0.62) | 0.50 (0.40-0.59)  |
| 11       | 0.71 (0.33-1.08)   | 1.0                | 0.61 (0.21-1.01)     | 0.70 (0.56-0.84)   | 0.69 (0.51-0.89) | 0.74 (0.65-0.83)  |
| 12       | 0.59 (0.18-1.01)   | 0.86 (0.59-1.13)   | 0.61 (0.21-1.01)     | 0.68 (0.53-0.82)   | 0.69 (0.51-0.89) | 0.71 (0.62-0.80)  |
| 13       | 0.48 (0.13-0.83)   | 1.0                | 0.34 (-0.02-0.69)    | 0.63 (0.48-0.78)   | 0.79 (0.66-0.93) | 0.69 (0.60-0.78)  |
| 14       | 0.75 (0.42-1.08)   | 0.75 (0.45-1.05)   | 0.35 (0.0-0.70)      | 0.80 (0.67-0.93)   | 0.69 (0.54-0.86) | 0.72 (0.63-0.81)  |
| 15       | 1.0                | 0.81 (0.50-1.11)   | 0.67 (0.32-1.01)     | 0.65 (0.49-0.81)   | 0.93 (0.84-1.03) | 0.80 (0.72-0.88)  |
| 16       | 0.73 (0.45-1.1)    | 0.74 (0.41-1.06)   | 0.77 (0.52-1.02)     | 0.77 (0.65-0.89)   | 0.85 (0.72-0.98) | 0.79 (0.71-0.87)  |
| 17       | 0.82 (0.58-1.06)   | 0.62 (0.26-0.97)   | 1.0                  | 0.51 (0.33-0.69)   | 0.81 (0.64-0.97) | 0.69 (0.59-0.79)  |
| Children |                    |                    |                      |                    |                  |                   |
| 18       | 0.25 (-0.20-0.70)  | 0.53 (0.06-0.99)   | 0.73 (0.45-1.02)     | 0.59 (0.40-0.78)   | 0.85 (0.69-1.01) | 0.67 (0.56-0.78)  |
| 19       | 0.80 (0.54-1.06)   | 0.86 (0.59-1.12)   | 0.89 (0.68-1.10)     | 0.81 (0.69-0.94)   | 0.86 (0.71-1.01) | 0.85 (0.68-1.02)  |
| 20       | 0.25 (-0.20-0.70)  | 1.0                | 0.47 (-0.13-1.07)    | 0.75 (0.58-0.93)   | 0.58 (0.34-0.83) | 0.66 (0.53-0.79)  |
| 21       | 0.32 (-0.14-0.78)  | 1.0                | *                    | 0.74 (0.57-0.91)   | 0.94 (0.81-1.06) | 0.78 (0.67-0.89)  |
| 22       | 0.12 (-0.12-0.36)  | 0.77 (0.50-1.03)   | 0.40 (0.20-0.60)     | 0.30 (0.16-0.45)   | 0.29 (0.06-0.53) | 0.36 (0.27-0.45)  |
| 23       | 0.31 (0.04-0.58)   | 0.48 (0.19-0.77)   | 0.49 (0.26-0.71)     | 0.20 (0.05-0.35)   | 0.19 (0.04-0.34) | 0.28 (0.19- 0.37) |
| 24       | 0.87 (0.61-1.12)   | 0.19 (-0.30-0.69)  | 0.87 (0.62-1.12)     | 0.57 (0.35-0.80)   | 1.0              | 0.70 (0.57-0.83)  |
| 25       | 0.66 (0.35-0.96)   | 1.0                | 1.0                  | 0.86 (0.73-0.99)   | *                | 0.81 (0.71-0.91)  |
| 26       | 0.060 (0.13-0.02)  | 1.0                | 0.57 (0.26-0.88)     | 0.72 (0.58-0.86)   | 0.74 (0.59-0.89) | 0.72 (0.63-0.81)  |
| 27       | 0.042 (0.10-0.01)  | 0.74 (0.41-1.06)   | 0.67 (0.34-1.01)     | 0.51(0.32-0.70)    | 0.71 (0.53-0.90) | 0.62 (0.50-0.74)  |

**Table S3:** Phase I inter-observer agreement measured by Kappa coefficient and percent (%) agreement

| Category           | # Items | Adults (n=5)        |             | Children (n= 2)    |             |
|--------------------|---------|---------------------|-------------|--------------------|-------------|
|                    |         | Kappa (95%CI)       | % Agreement | Kappa (95%CI)      | % Agreement |
| Area type          |         |                     |             |                    |             |
| Garbage/Litter     | 6       | 0.58 (0.47-0.69)    | 83.0        | 0.68 (0.41-0.95)   | 86.7        |
| Pollution          | 3       | - 0.06 (-0.22-0.10) | 89.0        | -0.06 (-0.16-0.04) | 0.0         |
| Recreational Sites | 6       | 0.33 (0.23-0.42)    | 88.0        | 1.0                | 100         |
| Infrastructure     | 14      | 0.77 (0.71-0.84)    | 89.0        | 0.45 (0.25-0.65)   | 71.6        |
| People             | 10      | 0.88 (0.79-0.96)    | 97.0        | 0.32 (0.08-0.56)   | 72.0        |
| Building           | 9       | 0.62 (0.55-0.70)    | 79.0        | 0.40 (0.20-0.60)   | 64.6        |

Note: Traffic and noise constructs were not assessed in phase I as panoramic photos were assessed.

**Table S4:** Phase II inter-observer agreement measured by Kappa coefficient and percent (%) agreement

| Category           | # Items | Adults (n=9)      |             | Children (n= 18) |             |
|--------------------|---------|-------------------|-------------|------------------|-------------|
|                    |         | Kappa (95%CI)     | % Agreement | Kappa (95%CI)    | % Agreement |
| Area type          | 1       | 0.81 (0.62- 1.01) | 45.0        | 0.62 (0.35-0.88) | 72.0        |
| Garbage/Litter     | 6       | 0.68 (0.56-0.81)  | 88.8        | 0.54 (0.40-0.68) | 84.7        |
| Pollution          | 8       | 0.60 (0.49-0.71)  | 82.8        | 0.67 (0.54-0.80) | 89.0        |
| Traffic and Noise  | 4       | 0.35 (0.25-0.44)  | 53.6        | 0.35 (0.22-0.48) | 58.0        |
| Recreational Sites | 6       | 0.73 (0.61-0.85)  | 90.4        | 0.57 (0.43-0.71) | 86.0        |
| Infrastructure     | 20      | 0.70 (0.63-0.77)  | 86.0        | 0.61 (0.53-0.70) | 84.9        |
| People             | 13      | 0.55 (0.46-0.64)  | 80.3        | 0.33 (0.23-0.44) | 79.6        |
| Building           | 18      | 0.63 (0.56-0.70)  | 86.7        | 0.61 (0.52-0.69) | 90.4        |
